# Supplementary material for: Chardonnay Grape Seed Flour Ameliorates Hepatic Steatosis and Insulin Resistance via Altered Hepatic Gene Expression for Oxidative Stress, Inflammation, and Lipid and Ceramide Synthesis in Diet-Induced Obese Mice
Source: PLoS One. 2016 Dec 15;11(12):e0167680. doi: 10.1371/journal.pone.0167680 (PMC5157984; doi:10.1371/journal.pone.0167680)
Supplement: S1 Table — (DOC) [file pone.0167680.s001.doc]

**Supporting information**

**S1 Table.** The top 10 biological functions and top 5 canonical and network pathways of genes significantly modulated by ChrSd

| Biological Function | *P* value | No. of genes differentially expressed | |
| --- | --- | --- | --- |
| Lipid Metabolism | 2.87  10-10‑3.11  10-2 | 48 | |
| Small Molecule Biochemistry | 2.87  10-10‑3.23  10-2 | 64 | |
| Vitamin and Mineral Metabolism | 2.87  10-10‑2.09  10-2 | 21 | |
| Molecular Transport | 2.52  10-7‑3.23  10-2 | 39 | |
| Cell Morphology | 6.92  10-4‑3.11  10-2 | 15 | |
| Hematological Disease | 5.48  10-4‑3.12  10-2 | 13 | |
| Metabolic Disease | 5.48  10-4‑3.11  10-2 | 25 | |
| Neurological Disease | 6.17  10-4‑3.11  10-2 | 35 | |
| Psychological Disorders | 6.17  10-4‑3.11  10-2 | 27 | |
| Dermatological Diseases and Conditions | 1.14  10-3‑1.05  10-2 | 18 | |
| Canonical Pathway | *P* value | Ratioa) | |
| Superpathway of Cholesterol Biosynthesis | 1.81  10-17 | 12/87 (0.138) | |
| Cholesterol Biosynthesis I | 1.53  10-13 | 8/40 (0.2) | |
| Cholesterol Biosynthesis II (via 24,25-dihydrolanosterol) | 1.53  10-13 | 8/40 (0.2) | |
| Cholesterol Biosynthesis III (via Desmosterol) | 1.53  10-13 | 8/40 (0.2) | |
| Zymosterol Biosynthesis | 7.12  10-10 | 5/22 (0.227) | |
| Network Pathway | | Scoreb) |  |
| Lipid Metabolism, Small Molecule Biochemistry, Vitamin and Mineral Metabolism | | 58 |  |
| Infectious Disease, Organismal Injury and Abnormalities, Renal and Urological Disease | | 36 |  |
| Protein Synthesis, Carbohydrate Metabolism, Lipid Metabolism | | 36 |  |
| Lipid Metabolism, Small Molecule Biochemistry, Vitamin and Mineral Metabolism | | 33 |  |
| Behavior, Neurological Disease, Endocrine System Development and Function | | 29 |  |

The functions and pathways that were most significant to the dataset were identified by Ingenuity Pathway Analysis (Ingenuity Systems).

a) Number of molecules (genes) that met the cut-off criteria, divided by the total number of molecules within a given pathway.

b) Likelihood of finding the focus molecules in a given pathway, expressed as the negative log of the *P* value.
